# Supplementary material for: Fabrication and Characterization of Dielectric ZnCr2O4 Nanopowders and Thin Films for Parallel-Plate Capacitor Applications
Source: MDPI journal article supplement (doi:10.3390/mi14091759), 2023-09-12
Supplement: s1 [file s1]

## Supplementary information

### Fabrication and Characterization of Dielectric $\text{ZnCr}_2\text{O}_4$ Nanopowders and Thin Films for Planar Capacitor Applications

*Vasyl Mykhailovych<sup>1-5</sup>, Gabriel Caruntu<sup>1-3,\*</sup>, Adrian Graur<sup>1</sup>, Mariia Mykhailovych<sup>1,4</sup>, Petro Fochuk<sup>4</sup>, Igor Fodchuk<sup>5</sup>, Gelu-Marius Rotaru<sup>6</sup>, Aurelian Rotaru<sup>1,\*</sup>*

<sup>1</sup>Department of Electrical Engineering and Computer Science & Research Center MANSiD, Stefan cel Mare University of Suceava, Strada Universităţii 13, 720229, Suceava, Romania

<sup>2</sup>Department of Chemistry and Biochemistry, Central Michigan University, 1200 S. Franklin St., Mount Pleasant, MI 48859, USA

<sup>3</sup>Science of Advanced Materials Program, Central Michigan University, 1200 S. Franklin St., Mount Pleasant, MI 48859, USA

<sup>4</sup>Department of General Chemistry and Material Science, Yuriy Fedkovych Chernivtsi National University, 2, Kotsjubynskyi St., 58012, Chernivtsi, Ukraine

<sup>5</sup>Physical, Technical and Computer Science Institute, Yuriy Fedkovych Chernivtsi National University, 2, Kotsjubynskyi St., 58012, Chernivtsi, Ukraine

<sup>6</sup>Faculty of Mechanical Engineering Mechatronics and Management & Research Center MANSiD, Stefan cel Mare University, 720229 Suceava, Romania

\* Correspondence: g.caruntu@cmich.edu and aurelian.rotaru@usm.ro

Keywords: High-k material,  $\text{ZnCr}_2\text{O}_4$  nanoparticles; shape-controlled synthesis; dielectric properties; thin films; planar capacitor.

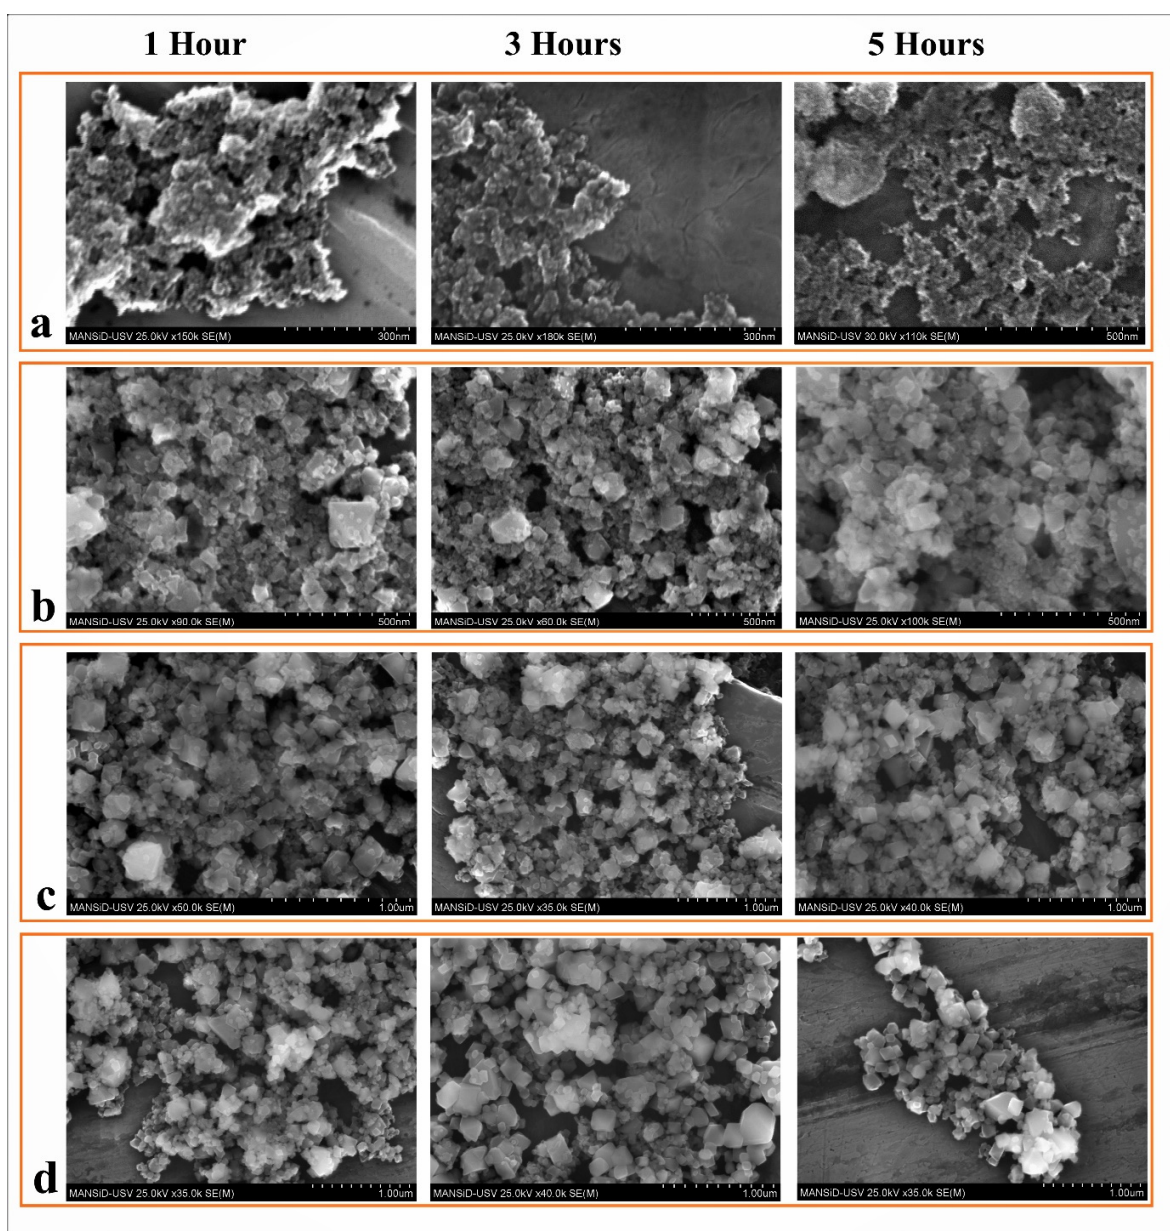

**Figure S1.** Electron microscopy images recorded on  $\text{ZnCr}_2\text{O}_4$  nanoparticles annealed at 500 °C, 700 °C, 800 °C and 900 °C for 1, 3 and 5 hours respectively.

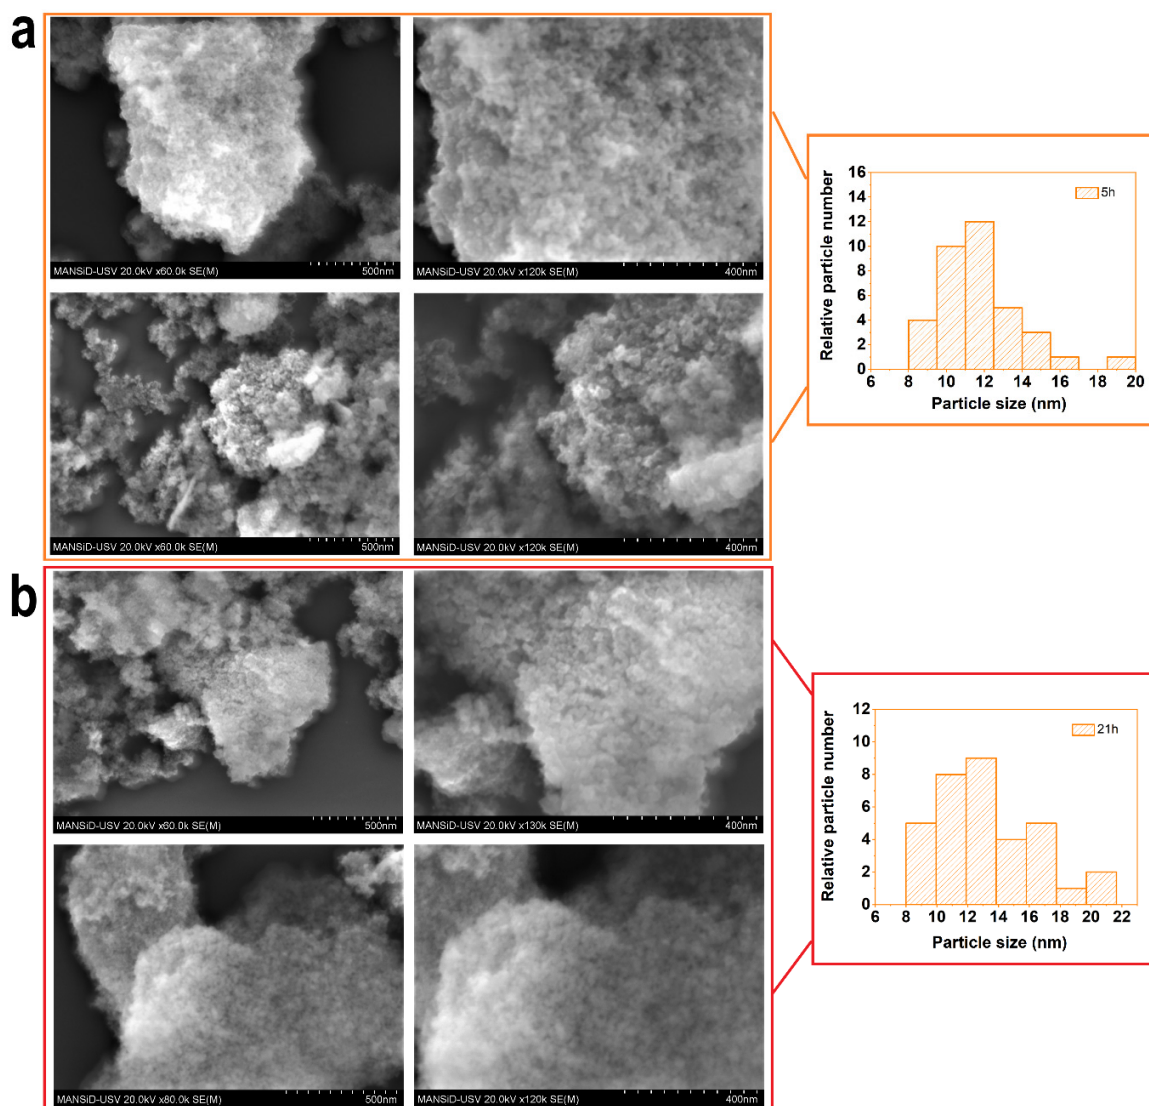

**Figure S2.** Series of electron microscopy images recorded on  $\text{ZnCr}_2\text{O}_4$  nanoparticles annealed at 500 °C for: **(a)** 5 hours and **(b)** 21 hours with their corresponding size distribution histograms.

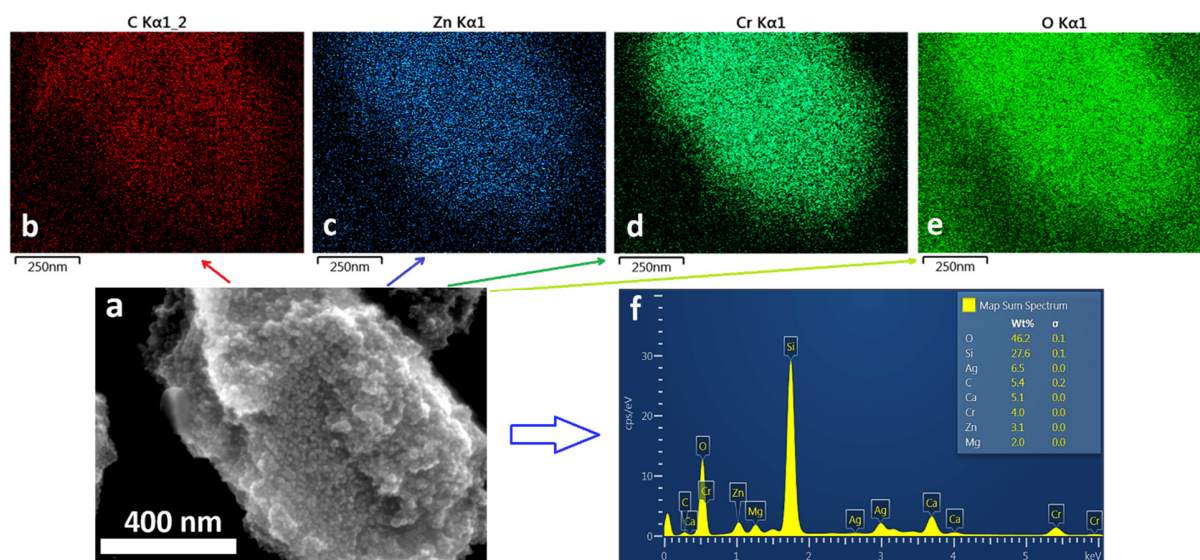

**Figure S3.** Depict FE-SEM image of sample annealed for 5 hours at 500 °C – (a), elemental mapping (b-e) and EDX spectrum with weight distribution of elements – (f).

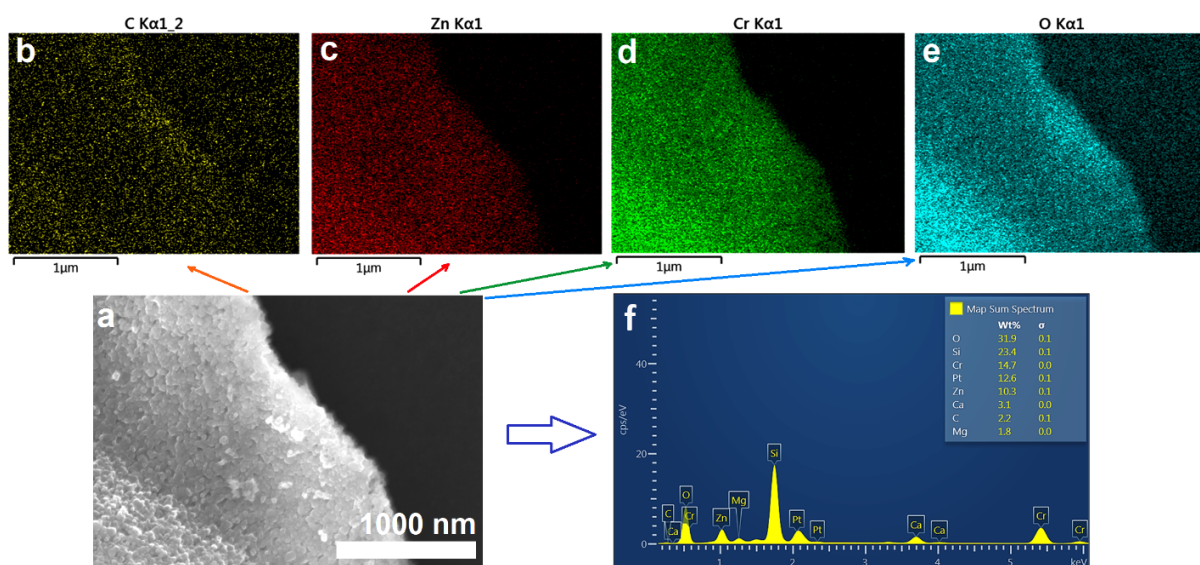

**Figure S4.** Depict FE-SEM image of sample annealed for 7 hours at 700 °C – (a), elemental mapping (b-d) and EDX spectrum with weight distribution of elements – (e).



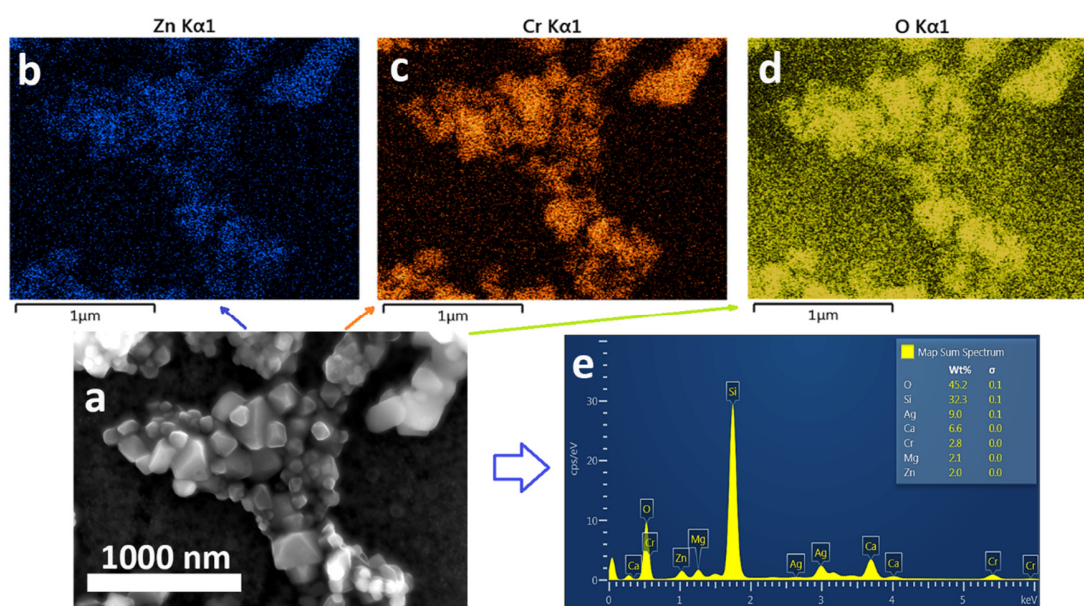

**Figure S5.** Depict FE-SEM image of sample annealed for 9 hours at 800 °C – (a), elemental mapping (b-d) and EDX spectrum with weight distribution of elements(e).

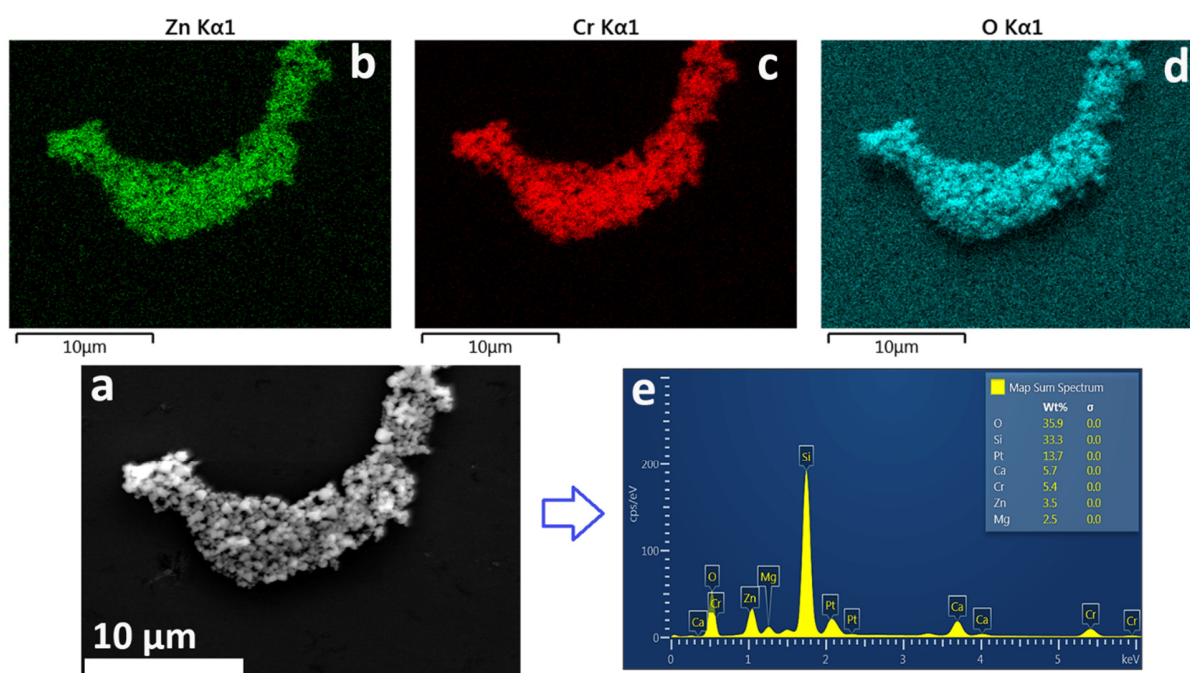

**Figure S6.** Depict FE-SEM image of sample annealed for 11 hours at 900 °C – (a), elemental mapping (b-d) and EDX spectrum with weight distribution of elements – (e).

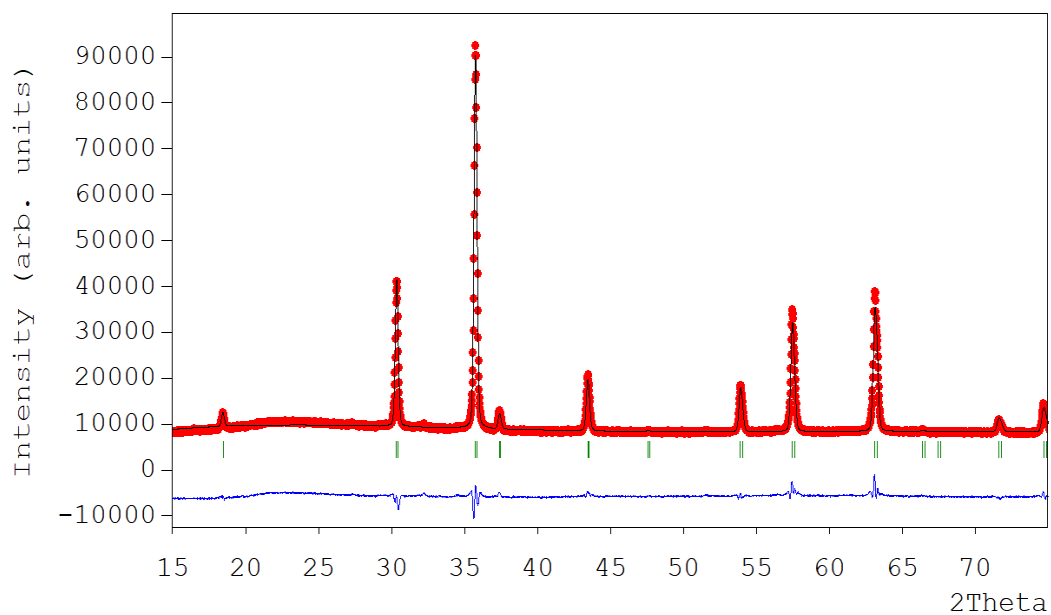

**Figure S7.** Rietveld refinement plots of nanostructured  $\text{ZnCr}_2\text{O}_4$  samples annealed in air at  $800^\circ\text{C}$  for 9h. The blue curve represents the difference  $I_{\text{obs}} - I_{\text{calcd}}$  pattern, whereas the green vertical bars represent the positions of the Bragg reflections

**Table S1.** Crystallographic parameters obtained from the Rietveld refinement of the  $\text{ZnCr}_2\text{O}_4$  nanopowder annealed at  $800^\circ\text{C}$  in air for 9 hours

| Phase                     | Lattice Parameters ( $\text{\AA}$ ) | Atomic Coordinates |          |         | Occupancy | B <sub>iso</sub> | R factors                                                                |
|---------------------------|-------------------------------------|--------------------|----------|---------|-----------|------------------|--------------------------------------------------------------------------|
| $\text{ZnCr}_2\text{O}_4$ | $a=b=c$                             | Ion                | $x=y=z$  | Wyckoff |           |                  | $R_p=2.81\%$ ;<br>$R_{wp}=3.75\%$ ;<br>$R_{exp}=1.90$ ;<br>$\chi^2=13.6$ |
|                           |                                     | Zn <sup>2+</sup>   | 0.125    | 8a      | 1.0       | 0.72             |                                                                          |
|                           |                                     | Cr <sup>3+</sup>   | 0.500    | 16d     | 1.0       | 0.45             |                                                                          |
|                           |                                     | O <sup>2-</sup>    | 0.259(1) | 32e     | 1.0       | 0.79             |                                                                          |

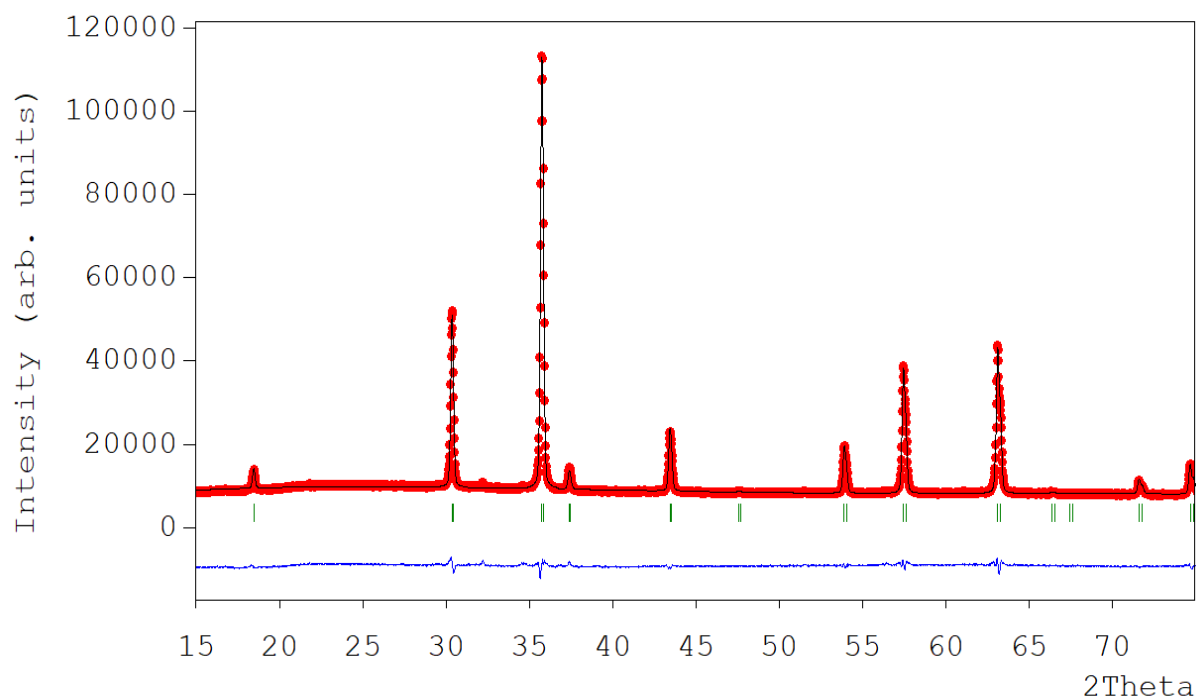

**Figure S8.** Rietveld refinement plots of nanostructured  $\text{ZnCr}_2\text{O}_4$  samples annealed in air at  $900^\circ\text{C}$  for 11h. The blue curve represents the difference  $I_{\text{obs}} - I_{\text{calcd}}$  pattern, whereas the green vertical bars represent the positions of the Bragg reflections

**Table S2.** Crystallographic parameters obtained from the Rietveld refinement of the  $\text{ZnCr}_2\text{O}_4$  nanopowder annealed at  $900^\circ\text{C}$  in air for 11 hours

| Phase                     | Lattice Parameters ( $\text{\AA}$ ) | Atomic Coordinates |          |         | Occupancy | $B_{\text{iso}}$ | R factors                                                                |
|---------------------------|-------------------------------------|--------------------|----------|---------|-----------|------------------|--------------------------------------------------------------------------|
| $\text{ZnCr}_2\text{O}_4$ | $a=b=c$                             | Ion                | $x=y=z$  | Wyckoff |           |                  | $R_p=2.37\%$ ;<br>$R_{wp}=2.95\%$ ;<br>$R_{exp}=1.01$ ;<br>$\chi^2=8.52$ |
|                           |                                     | Zn <sup>2+</sup>   | 0.125    | 8a      | 1.0       | 0.72             |                                                                          |
|                           |                                     | Cr <sup>3+</sup>   | 0.500    | 16d     | 1.0       | 0.45             |                                                                          |
|                           |                                     | O <sup>2-</sup>    | 0.259(8) | 32e     | 1.0       | 0.79             |                                                                          |
